# Supplementary material
Source: PubMed Central journal article supplement (PMC9529757)
Supplement: NIHMS1787672-supplement-Supplemental_Digital_Content.pdf [file NIHMS1787672-supplement-Supplemental_Digital_Content.pdf]

## Supplementary Tables and Figures

**Table S1:** Balance in covariates before and after 10 to 1 matching for complete cases measured by standardized mean difference (SMD). Mean  $\pm$  SD and N (%) are presented. P-values generated by ANOVA or chi-square tests. Matching led to good balance with SMDs < 0.1

|                        | Gest. HTN           |                     |         |       | Gest. DM            |                    |         |        | PE/E                |                     |         |        |
|------------------------|---------------------|---------------------|---------|-------|---------------------|--------------------|---------|--------|---------------------|---------------------|---------|--------|
|                        | No                  | Yes                 | P-value | SMD   | No                  | Yes                | P-value | SMD    | No                  | Yes                 | P-value | SMD    |
| <i>Before Matching</i> |                     |                     |         |       |                     |                    |         |        |                     |                     |         |        |
| N                      | 1466                | 44                  |         |       | 1475                | 35                 |         |        | 1466                | 44                  |         |        |
| Sys BP                 | 118.16 $\pm$ 12.94  | 121.75 $\pm$ 15.08  | 0.072   | 0.255 | 118.29 $\pm$ 13.06  | 117.23 $\pm$ 11.02 | 0.633   | 0.088  | 118.18 $\pm$ 12.98  | 121.25 $\pm$ 13.88  | 0.123   | 0.229  |
| Dias. BP               | 71.96 $\pm$ 9.59    | 74.86 $\pm$ 10.03   | 0.048   | 0.296 | 72.10 $\pm$ 9.62    | 69.51 $\pm$ 8.86   | 0.115   | 0.280  | 72.00 $\pm$ 9.65    | 73.52 $\pm$ 8.00    | 0.300   | 0.172  |
| Glucose                | 92.64 $\pm$ 14.64   | 89.91 $\pm$ 11.17   | 0.220   | 0.210 | 92.51 $\pm$ 14.61   | 94.91 $\pm$ 12.16  | 0.334   | 0.179  | 92.64 $\pm$ 14.64   | 90.18 $\pm$ 11.12   | 0.271   | 0.189  |
| Year                   | 1997.06 $\pm$ 12.50 | 1992.32 $\pm$ 13.10 | 0.013   | 0.370 | 1996.86 $\pm$ 12.60 | 1999.43 $\pm$ 9.56 | 0.231   | 0.230  | 1996.93 $\pm$ 12.53 | 1996.50 $\pm$ 12.92 | 0.823   | 0.034  |
| Age                    | 42.70 $\pm$ 10.50   | 41.25 $\pm$ 8.78    | 0.366   | 0.150 | 42.65 $\pm$ 10.49   | 43.01 $\pm$ 8.88   | 0.840   | 0.037  | 42.69 $\pm$ 10.49   | 41.47 $\pm$ 9.32    | 0.445   | 0.123  |
| BMI                    | 25.67 $\pm$ 4.43    | 26.93 $\pm$ 5.87    | 0.066   | 0.243 | 25.68 $\pm$ 4.48    | 26.82 $\pm$ 4.69   | 0.137   | 0.249  | 25.71 $\pm$ 4.48    | 25.78 $\pm$ 4.56    | 0.914   | 0.016  |
| White race             | 1396 (95.2%)        | 40 (90.9%)          | 0.341   | 0.171 | 1401 (95.0%)        | 35 (100.0%)        | 0.336   | 0.325  | 1396 (95.2%)        | 40 (90.9%)          | 0.341   | 0.171  |
| Blood relation         | 1066 (72.7%)        | 34 (77.3%)          | 0.619   | 0.105 | 1075 (72.9%)        | 25 (71.4%)         | 1.000   | 0.032  | 1064 (72.6%)        | 36 (81.8%)          | 0.236   | 0.222  |
| Creatinine             | 0.81 $\pm$ 0.12     | 0.79 $\pm$ 0.10     | 0.388   | 0.142 | 0.81 $\pm$ 0.12     | 0.80 $\pm$ 0.10    | 0.868   | 0.030  | 0.81 $\pm$ 0.12     | 0.82 $\pm$ 0.13     | 0.429   | 0.119  |
| Family hx of htn       | 532 (36.3%)         | 17 (38.6%)          | 0.873   | 0.049 | 536 (36.3%)         | 13 (37.1%)         | 1.000   | 0.017  | 527 (35.9%)         | 22 (50.0%)          | 0.080   | 0.287  |
| Family hx of dm        | 716 (48.8%)         | 24 (54.5%)          | 0.553   | 0.114 | 718 (48.7%)         | 22 (62.9%)         | 0.137   | 0.288  | 717 (48.9%)         | 23 (52.3%)          | 0.774   | 0.067  |
| Family hx of cvd       | 506 (34.5%)         | 18 (40.9%)          | 0.473   | 0.132 | 511 (34.6%)         | 13 (37.1%)         | 0.899   | 0.052  | 503 (34.3%)         | 21 (47.7%)          | 0.093   | 0.275  |
| Family hx of kid. dz   | 967 (66.0%)         | 29 (65.9%)          | 1.000   | 0.001 | 972 (65.9%)         | 24 (68.6%)         | 0.881   | 0.057  | 965 (65.8%)         | 31 (70.5%)          | 0.633   | 0.099  |
| Smoked                 | 383 (26.1%)         | 14 (31.8%)          | 0.502   | 0.126 | 388 (26.3%)         | 9 (25.7%)          | 1.000   | 0.013  | 386 (26.3%)         | 11 (25.0%)          | 0.981   | 0.030  |
| Predonation pregs.     | 2.93 $\pm$ 1.66     | 3.50 $\pm$ 2.16     | 0.025   | 0.298 | 2.93 $\pm$ 1.67     | 3.51 $\pm$ 2.09    | 0.042   | 0.310  | 2.94 $\pm$ 1.67     | 3.16 $\pm$ 1.99     | 0.385   | 0.122  |
| <i>After Matching</i>  |                     |                     |         |       |                     |                    |         |        |                     |                     |         |        |
| N                      | 440                 | 44                  |         |       | 350                 | 35                 |         |        | 440                 | 44                  |         |        |
| Sys BP                 | 121.88 $\pm$ 13.51  | 121.75 $\pm$ 15.08  | 0.953   | 0.009 | 116.88 $\pm$ 12.93  | 117.23 $\pm$ 11.02 | 0.878   | 0.029  | 121.02 $\pm$ 13.34  | 121.25 $\pm$ 13.88  | 0.912   | 0.017  |
| Dias. BP               | 74.56 $\pm$ 9.93    | 74.86 $\pm$ 10.03   | 0.846   | 0.031 | 69.81 $\pm$ 9.71    | 69.51 $\pm$ 8.86   | 0.861   | 0.032  | 73.19 $\pm$ 9.46    | 73.52 $\pm$ 8.00    | 0.823   | 0.038  |
| Glucose                | 90.32 $\pm$ 12.34   | 89.91 $\pm$ 11.17   | 0.833   | 0.035 | 95.82 $\pm$ 19.84   | 94.91 $\pm$ 12.16  | 0.791   | 0.055  | 89.34 $\pm$ 10.98   | 90.18 $\pm$ 11.12   | 0.629   | 0.076  |
| Year                   | 1993.22 $\pm$ 13.66 | 1992.32 $\pm$ 13.10 | 0.675   | 0.068 | 1999.05 $\pm$ 12.45 | 1999.43 $\pm$ 9.56 | 0.861   | 0.034  | 1996.31 $\pm$ 13.22 | 1996.50 $\pm$ 12.92 | 0.927   | 0.015  |
| Age                    | 41.12 $\pm$ 10.39   | 41.25 $\pm$ 8.78    | 0.937   | 0.013 | 42.94 $\pm$ 9.87    | 43.01 $\pm$ 8.88   | 0.969   | 0.007  | 42.05 $\pm$ 10.36   | 41.47 $\pm$ 9.32    | 0.724   | 0.058  |
| BMI                    | 26.79 $\pm$ 5.11    | 26.93 $\pm$ 5.87    | 0.864   | 0.025 | 26.97 $\pm$ 4.90    | 26.82 $\pm$ 4.69   | 0.864   | 0.031  | 25.62 $\pm$ 4.59    | 25.78 $\pm$ 4.56    | 0.829   | 0.034  |
| White race             | 398 (90.5%)         | 40 (90.9%)          | 1.000   | 0.016 | 350 (100.0%)        | 35 (100.0%)        |         | <0.001 | 400 (90.9%)         | 40 (90.9%)          | 1.000   | <0.001 |
| Blood relation         | 329 (74.8%)         | 34 (77.3%)          | 0.855   | 0.059 | 252 (72.0%)         | 25 (71.4%)         | 1.000   | 0.013  | 357 (81.1%)         | 36 (81.8%)          | 1.000   | 0.018  |
| Creatinine             | 0.79 $\pm$ 0.12     | 0.79 $\pm$ 0.10     | 0.900   | 0.021 | 0.80 $\pm$ 0.12     | 0.80 $\pm$ 0.10    | 0.855   | 0.034  | 0.82 $\pm$ 0.12     | 0.82 $\pm$ 0.13     | 0.805   | 0.039  |
| Family hx of htn       | 169 (38.4%)         | 17 (38.6%)          | 1.000   | 0.005 | 131 (37.4%)         | 13 (37.1%)         | 1.000   | 0.006  | 221 (50.2%)         | 22 (50.0%)          | 1.000   | 0.005  |
| Family hx of dm        | 237 (53.9%)         | 24 (54.5%)          | 1.000   | 0.014 | 217 (62.0%)         | 22 (62.9%)         | 1.000   | 0.018  | 233 (53.0%)         | 23 (52.3%)          | 1.000   | 0.014  |
| Family hx of cvd       | 176 (40.0%)         | 18 (40.9%)          | 1.000   | 0.019 | 136 (38.9%)         | 13 (37.1%)         | 0.987   | 0.035  | 209 (47.5%)         | 21 (47.7%)          | 1.000   | 0.005  |
| Family hx of kid. dz   | 282 (64.1%)         | 29 (65.9%)          | 0.940   | 0.038 | 244 (69.7%)         | 24 (68.6%)         | 1.000   | 0.025  | 313 (71.1%)         | 31 (70.5%)          | 1.000   | 0.015  |
| Smoked                 | 131 (29.8%)         | 14 (31.8%)          | 0.913   | 0.044 | 82 (23.4%)          | 9 (25.7%)          | 0.924   | 0.053  | 112 (25.5%)         | 11 (25.0%)          | 1.000   | 0.010  |
| Predonation pregs.     | 3.41 $\pm$ 2.09     | 3.50 $\pm$ 2.16     | 0.779   | 0.044 | 3.47 $\pm$ 2.04     | 3.51 $\pm$ 2.09    | 0.906   | 0.021  | 3.25 $\pm$ 1.90     | 3.16 $\pm$ 1.99     | 0.769   | 0.046  |

**Table S2:** Representative balance in covariates before and after 10 to 1 matching from 1 imputed data set. SMD= standardized mean difference. Ave. SMD= average SMD across 30 imputations. Mean  $\pm$  SD and N (%) are presented. P-values generated by ANOVA or chi-square tests. Matching led to good balance with average SMDs < 0.10.

|                    | Gest. HTN              |                     |         |       |          | Gest. DM            |                    |         |        |          | PE/E                |                     |         |       |          |
|--------------------|------------------------|---------------------|---------|-------|----------|---------------------|--------------------|---------|--------|----------|---------------------|---------------------|---------|-------|----------|
|                    | No                     | Yes                 | P-value | SMD   | Ave. SMD | No                  | Yes                | P-value | SMD    | Ave. SMD | No                  | Yes                 | P-value | SMD   | Ave. SMD |
|                    | <i>Before Matching</i> |                     |         |       |          |                     |                    |         |        |          |                     |                     |         |       |          |
| N                  | 1813                   | 49                  |         |       |          | 1819                | 43                 |         |        |          | 1814                | 48                  |         |       |          |
| Sys BP             | 118.06 $\pm$ 13.06     | 121.02 $\pm$ 15.12  | 0.119   | 0.210 | 0.209    | 118.14 $\pm$ 13.16  | 118.21 $\pm$ 11.63 | 0.971   | 0.006  | 0.021    | 118.06 $\pm$ 13.11  | 121.06 $\pm$ 13.38  | 0.118   | 0.227 | 0.223    |
| Dias. BP           | 71.90 $\pm$ 9.71       | 75.73 $\pm$ 10.74   | 0.007   | 0.375 | 0.376    | 72.04 $\pm$ 9.77    | 70.23 $\pm$ 8.90   | 0.229   | 0.194  | 0.191    | 71.95 $\pm$ 9.80    | 73.71 $\pm$ 8.01    | 0.219   | 0.196 | 0.197    |
| Glucose            | 92.31 $\pm$ 14.33      | 90.37 $\pm$ 11.72   | 0.347   | 0.148 | 0.176    | 92.23 $\pm$ 14.31   | 93.23 $\pm$ 12.37  | 0.650   | 0.075  | 0.113    | 92.33 $\pm$ 14.33   | 89.42 $\pm$ 11.26   | 0.162   | 0.226 | 0.19     |
| Year               | 1996.72 $\pm$ 12.96    | 1990.92 $\pm$ 13.79 | 0.002   | 0.433 | 0.433    | 1996.51 $\pm$ 13.09 | 1999.14 $\pm$ 9.13 | 0.190   | 0.233  | 0.233    | 1996.58 $\pm$ 13.02 | 1996.19 $\pm$ 13.05 | 0.838   | 0.030 | 0.03     |
| Age                | 42.44 $\pm$ 10.56      | 40.45 $\pm$ 9.56    | 0.192   | 0.198 | 0.198    | 42.37 $\pm$ 10.58   | 43.12 $\pm$ 8.65   | 0.647   | 0.077  | 0.077    | 42.41 $\pm$ 10.57   | 41.45 $\pm$ 8.98    | 0.532   | 0.098 | 0.098    |
| BMI                | 25.66 $\pm$ 4.44       | 27.22 $\pm$ 6.00    | 0.017   | 0.295 | 0.296    | 25.67 $\pm$ 4.47    | 27.01 $\pm$ 5.49   | 0.053   | 0.269  | 0.28     | 25.69 $\pm$ 4.49    | 26.12 $\pm$ 4.76    | 0.509   | 0.094 | 0.095    |
| White race         | 1719 (94.8%)           | 45 (91.8%)          | 0.550   | 0.120 | 0.117    | 1721 (94.6%)        | 43 (100.0%)        | 0.223   | 0.337  | 0.339    | 1720 (94.8%)        | 44 (91.7%)          | 0.524   | 0.126 | 0.123    |
| Blood relation     | 1315 (72.5%)           | 39 (79.6%)          | 0.351   | 0.166 | 0.166    | 1323 (72.7%)        | 31 (72.1%)         | 1.000   | 0.014  | 0.014    | 1314 (72.4%)        | 40 (83.3%)          | 0.131   | 0.265 | 0.265    |
| Creatinine         | 0.81 $\pm$ 0.12        | 0.80 $\pm$ 0.11     | 0.494   | 0.103 | 0.101    | 0.81 $\pm$ 0.12     | 0.80 $\pm$ 0.11    | 0.625   | 0.081  | 0.079    | 0.81 $\pm$ 0.12     | 0.83 $\pm$ 0.12     | 0.330   | 0.142 | 0.144    |
| Fam. hx of htn     | 659 (36.3%)            | 20 (40.8%)          | 0.624   | 0.092 | 0.080    | 664 (36.5%)         | 15 (34.9%)         | 0.954   | 0.034  | 0.041    | 654 (36.1%)         | 25 (52.1%)          | 0.034   | 0.327 | 0.283    |
| Fam. hx of dm      | 896 (49.4%)            | 25 (51.0%)          | 0.939   | 0.032 | 0.028    | 896 (49.3%)         | 25 (58.1%)         | 0.319   | 0.179  | 0.193    | 895 (49.3%)         | 26 (54.2%)          | 0.607   | 0.097 | 0.093    |
| Fam. hx of cvd     | 632 (34.9%)            | 22 (44.9%)          | 0.193   | 0.206 | 0.146    | 639 (35.1%)         | 15 (34.9%)         | 1.000   | 0.005  | 0.042    | 630 (34.7%)         | 24 (50.0%)          | 0.042   | 0.313 | 0.26     |
| Fam. hx of kid. dz | 1210 (66.7%)           | 34 (69.4%)          | 0.814   | 0.057 | 0.053    | 1214 (66.7%)        | 30 (69.8%)         | 0.800   | 0.065  | 0.063    | 1210 (66.7%)        | 34 (70.8%)          | 0.657   | 0.089 | 0.122    |
| Smoked             | 470 (25.9%)            | 15 (30.6%)          | 0.567   | 0.104 | 0.117    | 475 (26.1%)         | 10 (23.3%)         | 0.806   | 0.066  | 0.066    | 474 (26.1%)         | 11 (22.9%)          | 0.738   | 0.075 | 0.074    |
| Predonation pregs. | 2.94 $\pm$ 1.66        | 3.49 $\pm$ 2.09     | 0.023   | 0.291 | 0.299    | 2.94 $\pm$ 1.66     | 3.42 $\pm$ 1.94    | 0.066   | 0.262  | 0.262    | 2.95 $\pm$ 1.66     | 3.23 $\pm$ 1.94     | 0.250   | 0.156 | 0.156    |
|                    | <i>After Matching</i>  |                     |         |       |          |                     |                    |         |        |          |                     |                     |         |       |          |
| N                  | 490                    | 49                  |         |       |          | 430                 | 43                 |         |        |          | 480                 | 48                  |         |       |          |
| Sys BP             | 121.13 $\pm$ 12.82     | 121.02 $\pm$ 15.12  | 0.954   | 0.008 | 0.025    | 117.89 $\pm$ 12.23  | 118.21 $\pm$ 11.63 | 0.869   | 0.027  | 0.031    | 120.61 $\pm$ 13.21  | 121.06 $\pm$ 13.38  | 0.820   | 0.034 | 0.033    |
| Dias. BP           | 75.24 $\pm$ 10.02      | 75.73 $\pm$ 10.74   | 0.745   | 0.047 | 0.038    | 70.55 $\pm$ 10.12   | 70.23 $\pm$ 8.90   | 0.845   | 0.033  | 0.024    | 73.00 $\pm$ 9.83    | 73.71 $\pm$ 8.01    | 0.629   | 0.079 | 0.025    |
| Glucose            | 90.71 $\pm$ 11.48      | 90.37 $\pm$ 11.72   | 0.841   | 0.030 | 0.038    | 93.39 $\pm$ 13.48   | 93.23 $\pm$ 12.37  | 0.943   | 0.012  | 0.028    | 89.51 $\pm$ 10.62   | 89.42 $\pm$ 11.26   | 0.956   | 0.008 | 0.021    |
| Year               | 1991.40 $\pm$ 13.86    | 1990.92 $\pm$ 13.79 | 0.815   | 0.035 | 0.029    | 1998.80 $\pm$ 11.90 | 1999.14 $\pm$ 9.13 | 0.857   | 0.032  | 0.048    | 1994.65 $\pm$ 13.49 | 1996.19 $\pm$ 13.05 | 0.451   | 0.116 | 0.031    |
| Age                | 40.53 $\pm$ 10.21      | 40.45 $\pm$ 9.56    | 0.959   | 0.008 | 0.031    | 42.90 $\pm$ 10.10   | 43.12 $\pm$ 8.65   | 0.894   | 0.023  | 0.038    | 41.10 $\pm$ 10.01   | 41.45 $\pm$ 8.98    | 0.817   | 0.037 | 0.034    |
| BMI                | 26.85 $\pm$ 5.24       | 27.22 $\pm$ 6.00    | 0.650   | 0.064 | 0.053    | 26.88 $\pm$ 4.96    | 27.01 $\pm$ 5.49   | 0.871   | 0.025  | 0.022    | 25.77 $\pm$ 4.63    | 26.12 $\pm$ 4.76    | 0.622   | 0.074 | 0.036    |
| Blood relation     | 387 (79.0%)            | 39 (79.6%)          | 1.000   | 0.015 | 0.023    | 310 (72.1%)         | 31 (72.1%)         | 1.000   | <0.001 | 0.031    | 411 (85.6%)         | 40 (83.3%)          | 0.830   | 0.063 | 0.039    |
| White race         | 445 (90.8%)            | 45 (91.8%)          | 1.000   | 0.036 | 0.027    | 430 (100.0%)        | 43 (100.0%)        | <0.001  | 0.001  | 0.001    | 447 (93.1%)         | 44 (91.7%)          | 0.936   | 0.055 | 0.031    |
| Creatinine         | 0.80 $\pm$ 0.12        | 0.80 $\pm$ 0.11     | 0.799   | 0.040 | 0.033    | 0.80 $\pm$ 0.13     | 0.80 $\pm$ 0.11    | 0.907   | 0.020  | 0.034    | 0.84 $\pm$ 0.14     | 0.83 $\pm$ 0.12     | 0.596   | 0.083 | 0.026    |
| Fam. hx of htn     | 190 (38.8%)            | 20 (40.8%)          | 0.900   | 0.042 | 0.023    | 141 (32.8%)         | 15 (34.9%)         | 0.914   | 0.044  | 0.030    | 241 (50.2%)         | 25 (52.1%)          | 0.923   | 0.038 | 0.022    |
| Fam. hx of dm      | 253 (51.6%)            | 25 (51.0%)          | 1.000   | 0.012 | 0.025    | 256 (59.5%)         | 25 (58.1%)         | 0.988   | 0.028  | 0.029    | 262 (54.6%)         | 26 (54.2%)          | 1.000   | 0.008 | 0.024    |
| Fam. hx of cvd     | 226 (46.1%)            | 22 (44.9%)          | 0.989   | 0.025 | 0.026    | 128 (29.8%)         | 15 (34.9%)         | 0.601   | 0.110  | 0.031    | 232 (48.3%)         | 24 (50.0%)          | 0.945   | 0.033 | 0.027    |
| Fam. hx of kid. dz | 334 (68.2%)            | 34 (69.4%)          | 0.988   | 0.026 | 0.018    | 300 (69.8%)         | 30 (69.8%)         | 1.000   | <0.001 | 0.028    | 359 (74.8%)         | 34 (70.8%)          | 0.670   | 0.089 | 0.03     |
| Smoked             | 144 (29.4%)            | 15 (30.6%)          | 0.988   | 0.027 | 0.019    | 100 (23.3%)         | 10 (23.3%)         | 1.000   | <0.001 | 0.031    | 119 (24.8%)         | 11 (22.9%)          | 0.911   | 0.044 | 0.026    |
| Predonation pregs. | 3.48 $\pm$ 2.13        | 3.49 $\pm$ 2.09     | 0.975   | 0.005 | 0.024    | 3.46 $\pm$ 2.04     | 3.42 $\pm$ 1.94    | 0.909   | 0.019  | 0.023    | 3.27 $\pm$ 1.90     | 3.23 $\pm$ 1.94     | 0.880   | 0.023 | 0.026    |

**Table S3:** Proportional hazards regression results for time from donation to development of long-term outcomes based on predonation pregnancy complications. The outcomes of donors experiencing a given predonation pregnancy complication were compared to matched donors with predonation pregnancies without the given complication. Cox proportional hazards results for individuals with complete data for matching variables are presented. Donors may be classified into more than 1 predonation pregnancy complication category.

| Pregnancy complication                                                           | N  | HR (95% CI); p-value for outcome |                          |                         |                         |                          |
|----------------------------------------------------------------------------------|----|----------------------------------|--------------------------|-------------------------|-------------------------|--------------------------|
|                                                                                  |    | HTN                              | DM                       | CVD                     | eGFR<45                 | eGFR<30                  |
| <i>Analysis including individuals with both pre and postdonation pregnancies</i> |    |                                  |                          |                         |                         |                          |
| Gestational HTN                                                                  | 44 | 1.77 (1.18, 2.65); ≤0.01         | 1.70 (0.72, 4.02); 0.22  | 1.21 (0.66, 2.24); 0.54 | 0.70 (0.25, 1.94); 0.49 | 0.53 (0.06, 4.49); 0.56  |
| Gestational DM                                                                   | 35 | 1.14 (0.61, 2.14); 0.68          | 2.95 (1.28, 6.80); ≤0.01 | 0.84 (0.20, 3.56); 0.82 | 1.23 (0.54, 2.79); 0.62 | 2.28 (0.48, 10.89); 0.30 |
| Preeclampsia/ Eclampsia                                                          | 44 | 0.91 (0.52, 1.60); 0.74          | 1.60 (0.58, 4.42); 0.37  | 1.83 (0.93, 3.59); 0.08 | 1.01 (0.41, 2.46); 0.98 | 0.84 (0.10, 7.17); 0.88  |
| <i>Analysis restricted to individuals with only predonation pregnancies</i>      |    |                                  |                          |                         |                         |                          |
| Gestational HTN                                                                  | 38 | 1.70 (1.08, 2.69); 0.02          | 1.18 (0.42, 3.33); 0.75  | 1.31 (0.70, 2.44); 0.40 | 0.77 (0.29, 2.06); 0.61 | 0.60 (0.07, 4.85); 0.63  |
| Gestational DM                                                                   | 32 | 1.18 (0.64, 2.17); 0.59          | 3.89 (1.65, 9.17); ≤0.01 | 0.84 (0.21, 3.39); 0.80 | 1.16 (0.53, 2.51); 0.71 | 1.08 (0.30, 3.96); 0.91  |
| Preeclampsia/ Eclampsia                                                          | 39 | 1.11 (0.62, 1.99); 0.73          | 0.96 (0.31, 2.99); 0.95  | 1.74 (0.95, 3.20); 0.07 | 0.96 (0.38, 2.41); 0.93 | 0.98 (0.11, 8.75); 0.98  |

**Figure S1: Distribution of propensity scores across 30 imputations before and after matching.** In each imputed data set every donor with a given predonation pregnancy complication was matched to 10 control donors based on nearest neighbor propensity score matching.

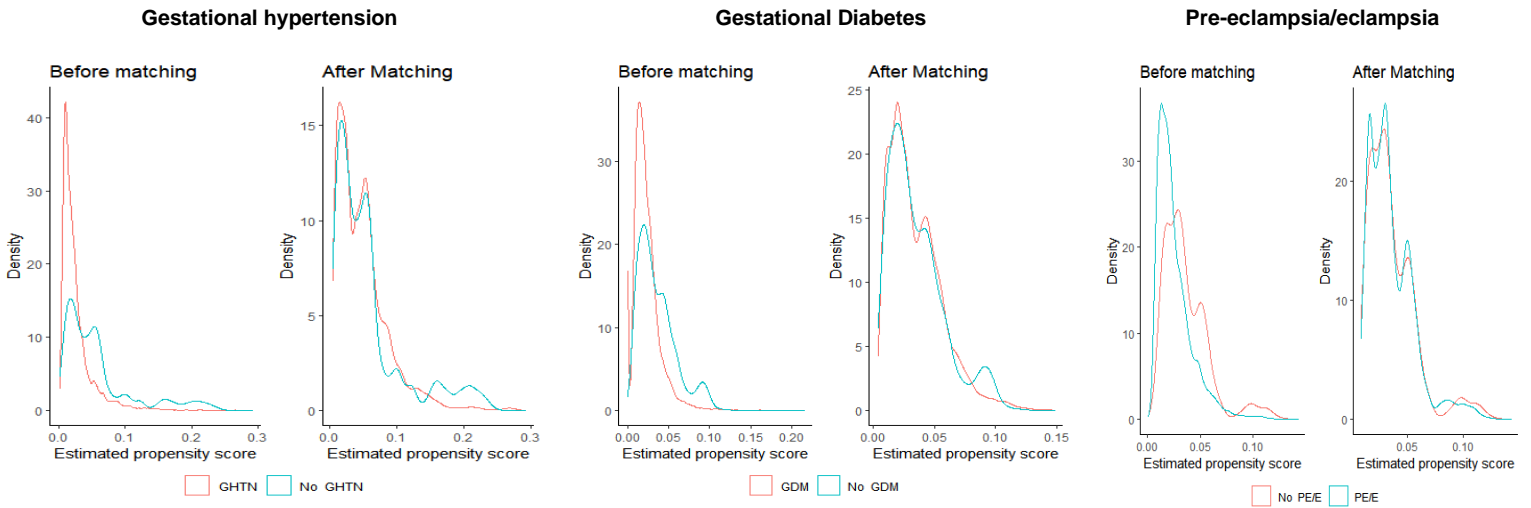

**Figure S2: Distribution of propensity scores before and after matching for donors with complete information for matching criteria.** Each donor with a given pre-donation pregnancy complication was matched to 10 control donors based on nearest neighbor propensity score matching.

**Gestational hypertension**

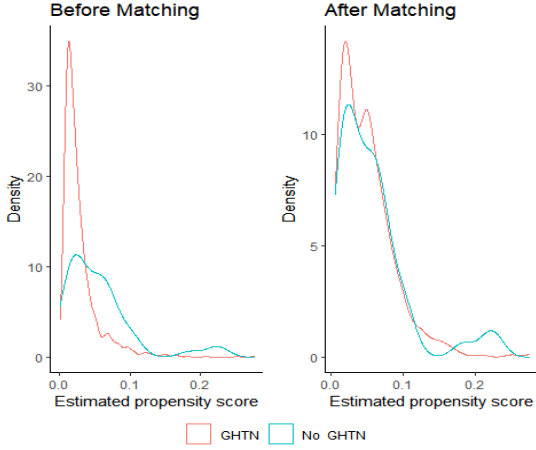

**Gestational Diabetes**

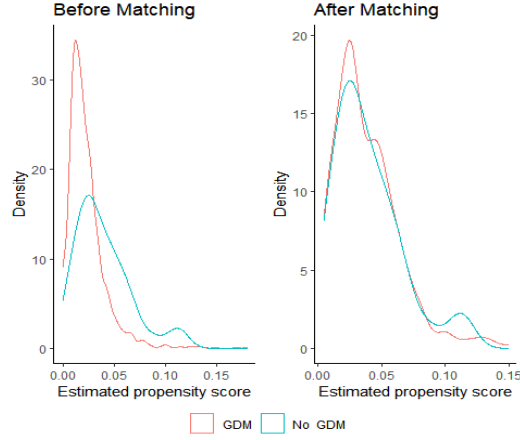

**Pre-eclampsia/eclampsia**

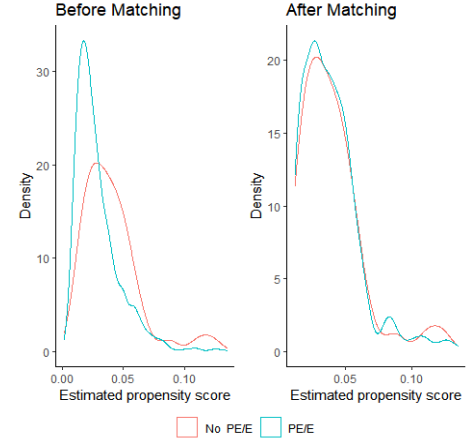

**Figure S3: Postdonation reduced-renal function free probability by predonation pregnancy complications. Kaplan Meier Curves with confidence intervals from 1 imputation.** Outcomes of donors with a given predonation pregnancy complication were compared to matched donors without the given complication. Donors may be classified into more than 1 predonation pregnancy complication category. Time "0" represents 182 days postdonation.

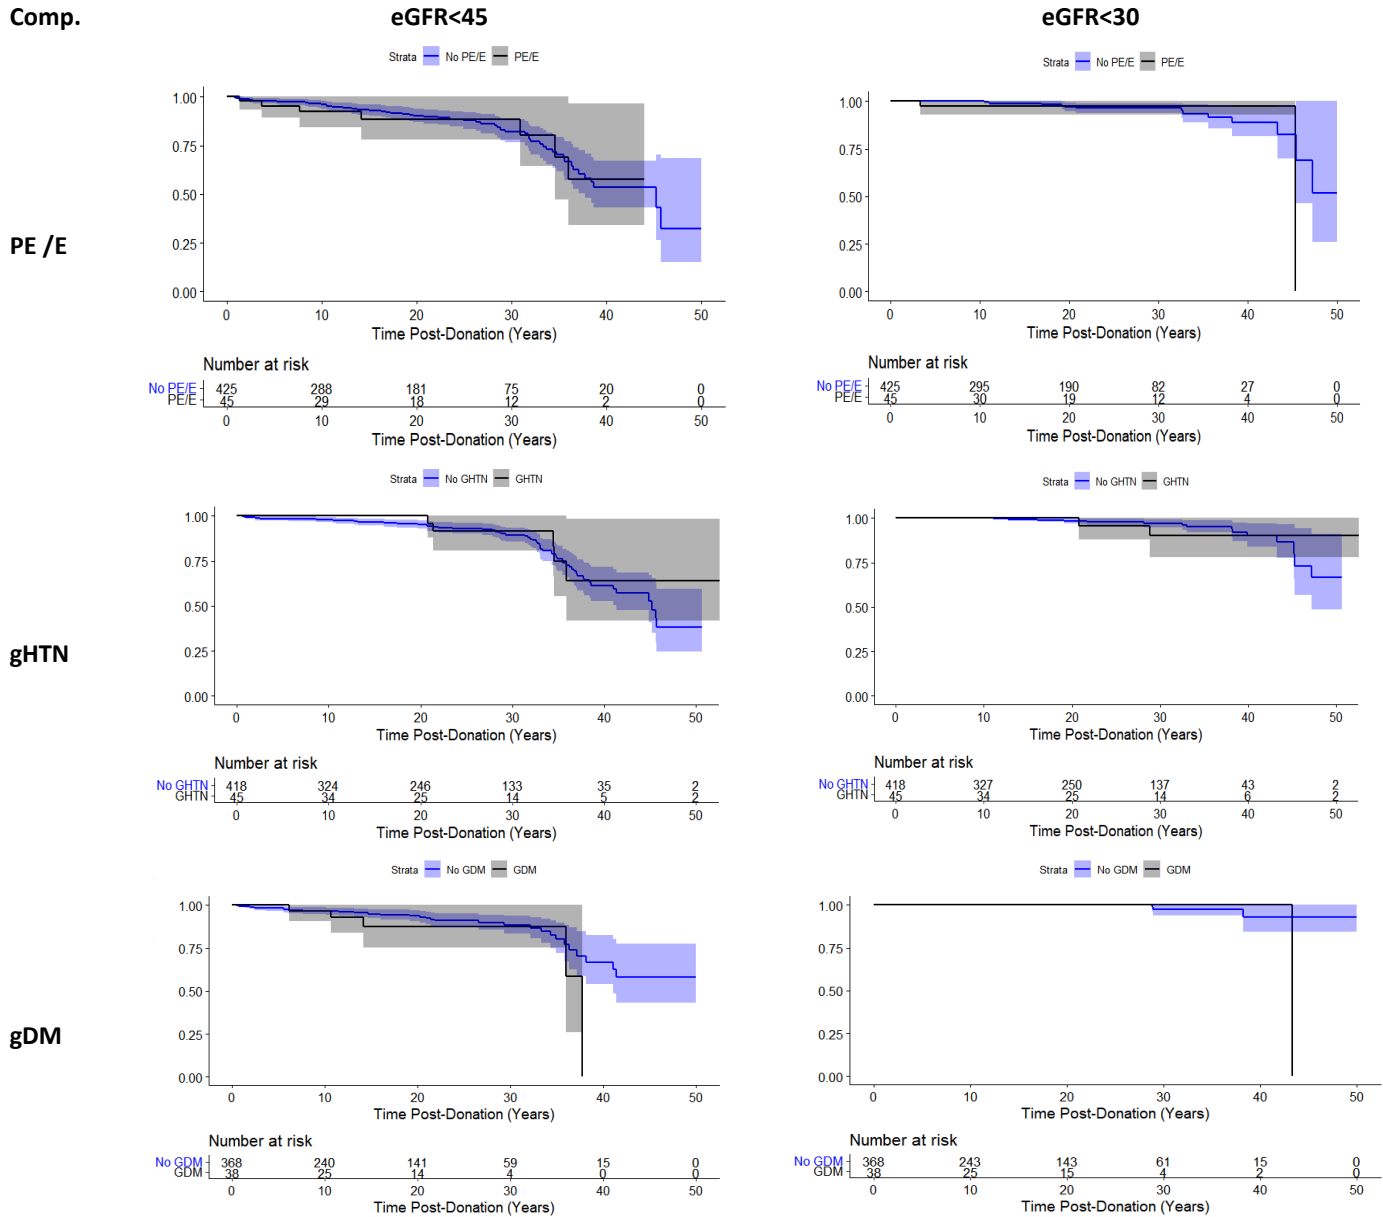

Comp=Complication, PE/E=pre-eclampsia/eclampsia, gHTN= gestational hypertension

**Figure S4: Postdonation disease free probability by predonation pregnancy complications. Kaplan Meier Curves with confidence intervals for donors with complete information for matching criteria.** Outcomes of donors with a given predonation pregnancy complication were compared to matched donors without the given complication. Donors may be classified into more than 1 predonation pregnancy complication category.

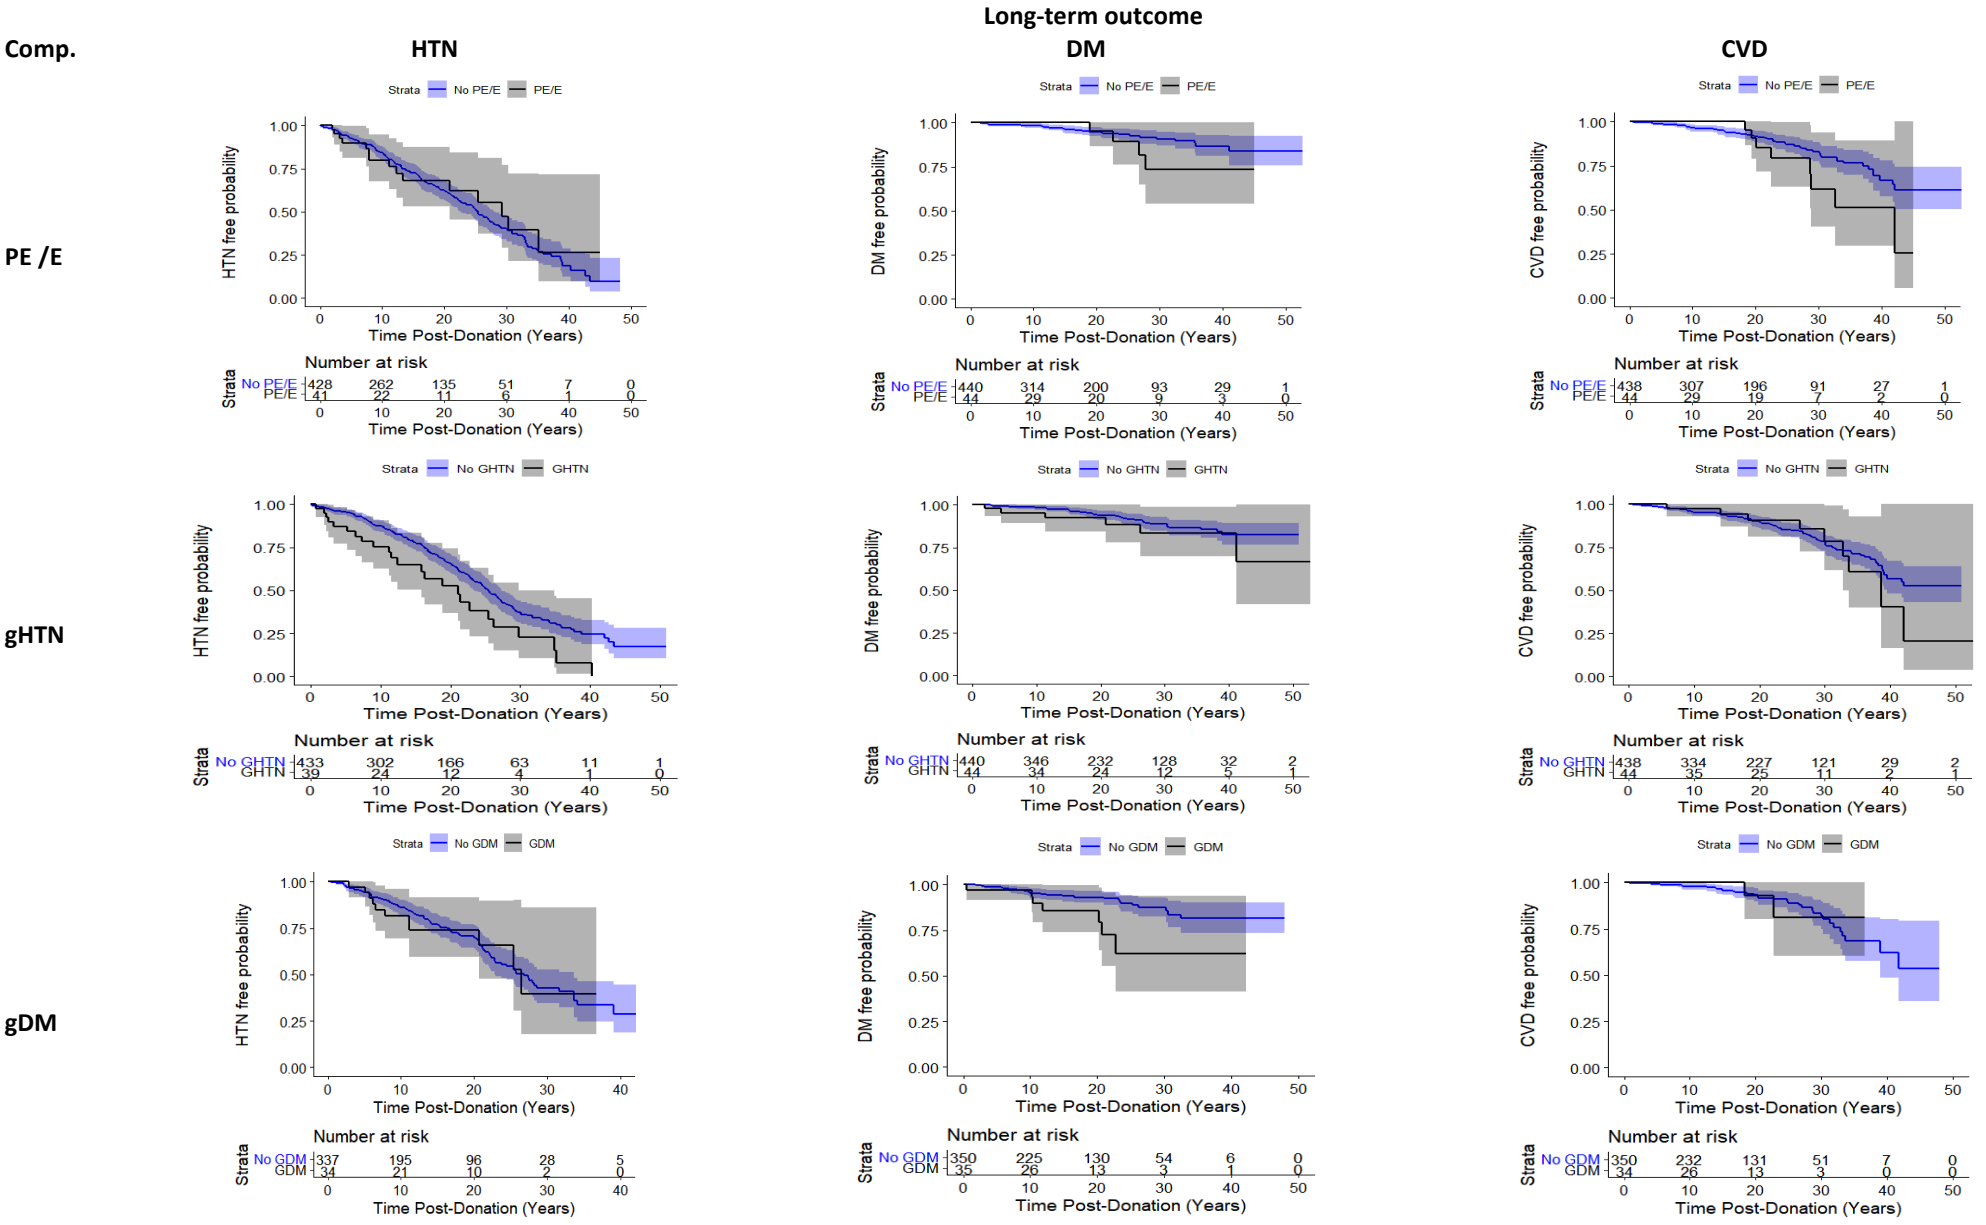

Comp=Complication, PE/E=pre-eclampsia/eclampsia, gHTN= gestational hypertension

**Figure S5: Postdonation reduced-renal function free probability by predonation pregnancy complications. Kaplan Meier Curves with confidence intervals for donors with complete information for matching criteria.** Outcomes of donors with a given predonation pregnancy complication were compared to matched donors without the given complication. Donors may be classified into more than 1 predonation pregnancy complication category. Time “0” represents 182 days postdonation.

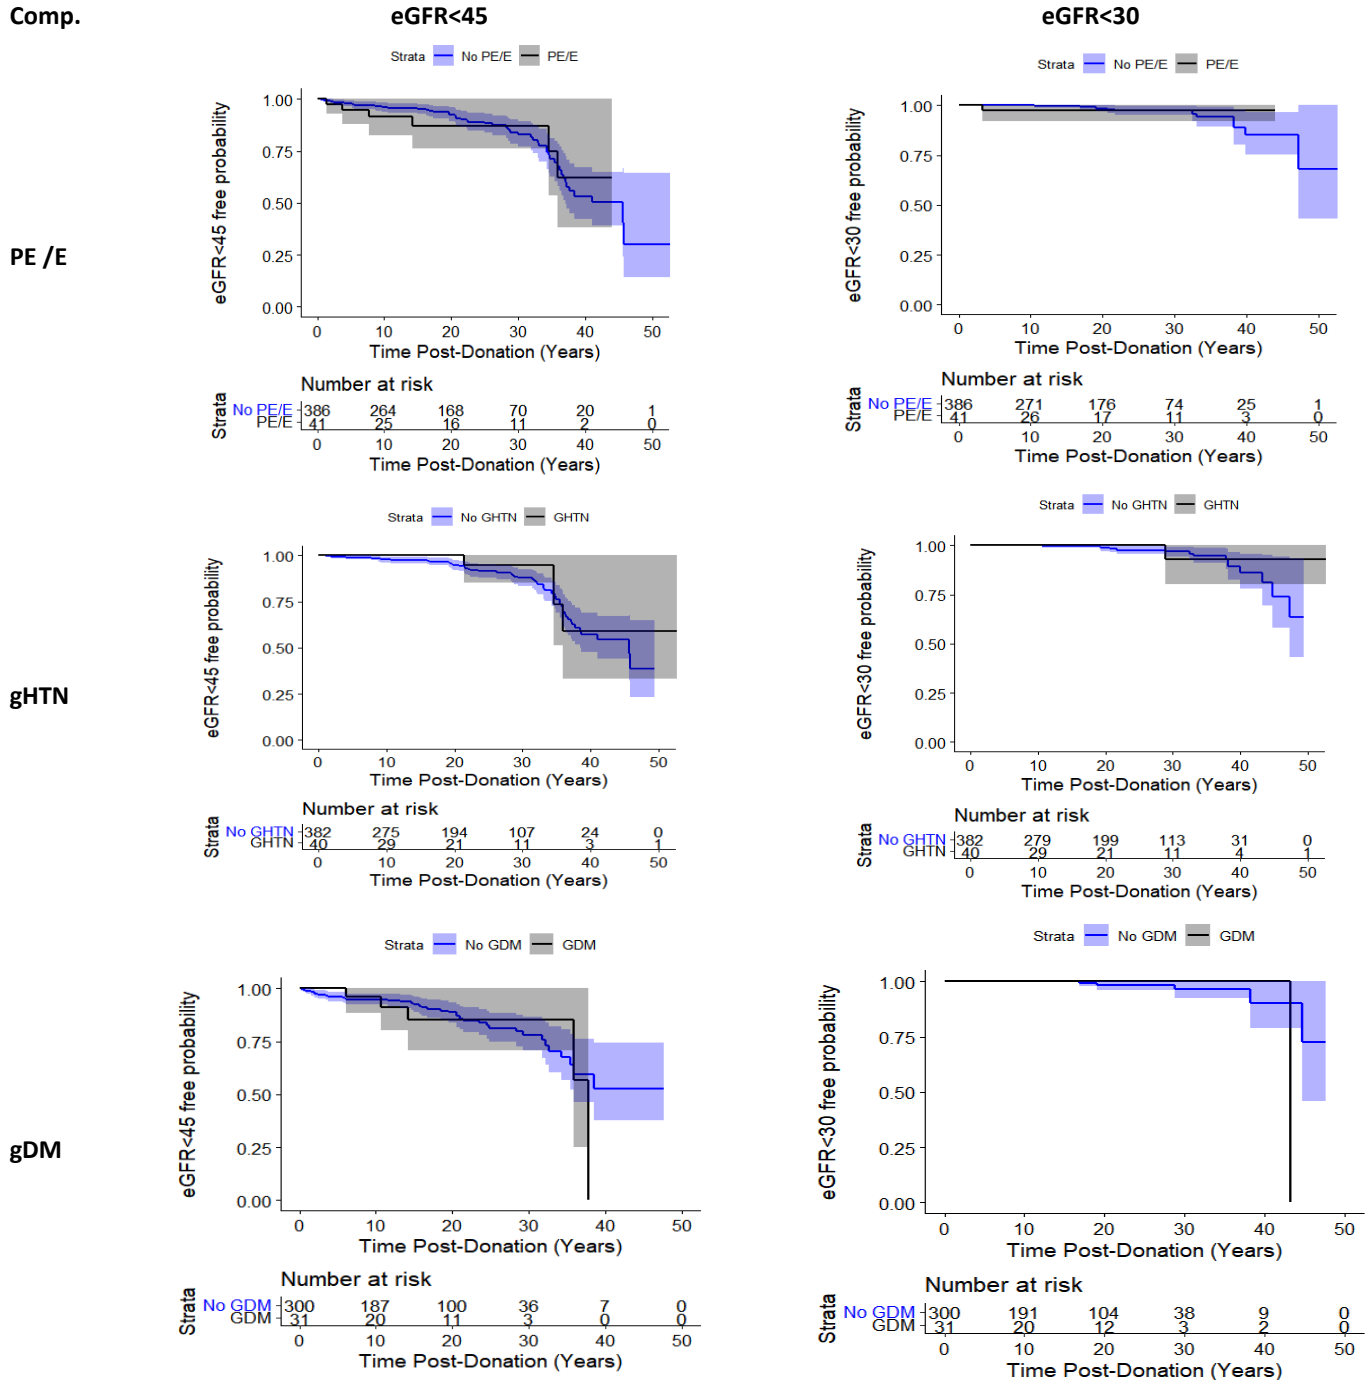

Comp=Complication, PE/E=pre-eclampsia/eclampsia, gHTN= gestational hypertension
